## METHODS &amp; TECHNIQUES

# Estimating monotonic rates from biological data using local linear regression

Colin Olito\*, Craig R. White, Dustin J. Marshall and Diego R. Barneche

## ABSTRACT

Accessing many fundamental questions in biology begins with empirical estimation of simple monotonic rates of underlying biological processes. Across a variety of disciplines, ranging from physiology to biogeochemistry, these rates are routinely estimated from non-linear and noisy time series data using linear regression and *ad hoc* manual truncation of non-linearities. Here, we introduce the R package LoLinR, a flexible toolkit to implement local linear regression techniques to objectively and reproducibly estimate monotonic biological rates from non-linear time series data, and demonstrate possible applications using metabolic rate data. LoLinR provides methods to easily and reliably estimate monotonic rates from time series data in a way that is statistically robust, facilitates reproducible research and is applicable to a wide variety of research disciplines in the biological sciences.

**KEY WORDS:** Biological rates, Time series, Local linear regression, Autocorrelation, Linearity, Reproducible research

## INTRODUCTION

Living organisms, the communities they form and the environments they inhabit are all temporally dynamic systems. Consequently, many fundamental questions in biology begin with estimating the rates of underlying biological processes. When non-linearity is of biological interest and accurately represents the rate of interest, then non-linear, function-valued approaches may be most appropriate (Marshall et al., 2013; Stinchcombe et al., 2012). Non-linear approaches can be further generalized using function regression if the question also requires accounting for change in parameters as a function of other variables (Yen et al., 2015). However, in many cases, there is a putatively linear rate that we wish to estimate free of artifactual non-linear regions (e.g. Fig. 1). In these cases, researchers often reduce experimental complexity by holding state variables constant in order to estimate monotonic rates, which are then used in subsequent analyses. For example, the metabolic theory of ecology (MTE) seeks to explain ecological patterns by scaling the size dependence and temperature dependence of metabolic rates from individuals to ecosystems (Brown et al., 2004; Gillooly et al., 2001). The study of MTE therefore begins with estimates of metabolic rate at standardized temperatures (e.g. Barneche et al., 2014; Brown et al., 2004; Gillooly et al., 2001; White et al., 2011a,b). Similarly, predicting the impacts of climate change on ecosystem processes, such as community primary productivity, begins with estimates of O<sub>2</sub> production rates (Tanaka et al., 2013; Yvon-Durocher et al., 2015). Other examples

include estimates of leaf respiration rate (Shapiro et al., 2004), ecosystem functioning (Ross et al., 2013), and components of biogeochemical cycles including denitrification (Song et al., 2011), CO<sub>2</sub> and CH<sub>4</sub> gas emissions (e.g. Larmola et al., 2013). Thus, accurate estimates of biological rates provide the foundation for many branches of biology but, surprisingly, there are few systematic approaches to estimating monotonic rates from biological data.

Biological rates are routinely estimated from non-linear or noisy time series using linear regression. For example, many studies in physiology, ecosystem ecology and biogeochemistry monitor reactant consumption in closed chambers at standardized temperatures, and use the resulting, often non-linear, time series to estimate the rate of interest (e.g. Larmola et al., 2013; Ross et al., 2013; Song et al., 2011; Tanaka et al., 2013; White et al., 2011a,b; Yvon-Durocher et al., 2015). There are several problems with this approach. First, the data used rarely meet the criteria for linear regression to be an appropriate analytic tool. The first measures in a time series are often noisy as equipment/samples/organisms equilibrate after setup, while at the end of the time series, rates can change because of saturation effects or the exhaustion of a limiting resource (e.g. Fig. 1). Consequently, naive linear regression of a full time series can conflate the biological rate of interest with undesired effects. Second, common *ad hoc* methods to ameliorate this problem, such as manually truncating non-linear portions of the time series, introduce subjectivity into the analysis, and may reduce statistical power by removing useful data. Last, published studies rarely provide both the raw data and the specific methods necessary to reproduce reported results. This makes it difficult or impossible to evaluate the appropriateness of the methods, and is particularly problematic in a new era that demands scientific transparency and reproducibility (Fang et al., 2012; Grieneisen and Zhang, 2012). The need to estimate monotonic rates from time series data will only increase as technological advances continue to make collection of high-resolution data easy and cost effective. This presents biologists with a non-trivial challenge: to reliably estimate biological rates in a way that is statistically robust and fully reproducible.

Here, we introduce the LoLinR package for R (R Development Core Team, 2016), which provides a suite of simple functions to implement local linear regressions to estimate monotonic rates from time series data. We describe the general approach to reproducible and statistically robust estimation of monotonic rates, and the specific methods used in the package. We then walk through two example analyses to illustrate the utility of the package, as well as important analytic considerations and pitfalls (all computer code necessary to reproduce the analyses and figures in this article are available in Scripts S1 and S2; additional examples are available through <https://github.com/colin-olito/LoLinR>).

## MATERIALS AND METHODS

We first describe the base function around which the LoLinR package is built, then detail the component linearity metrics underpinning the function. The methods provided in the LoLinR package are a

Centre for Geometric Biology, School of Biological Sciences, Monash University, Clayton, VIC 3800, Australia.

\*Author for correspondence (colin.olito@gmail.com)

 C.O., 0000-0001-6883-0367; C.R.W., 0000-0002-0200-2187; D.R.B., 0000-0002-4568-2362

Received 26 August 2016; Accepted 14 December 2016

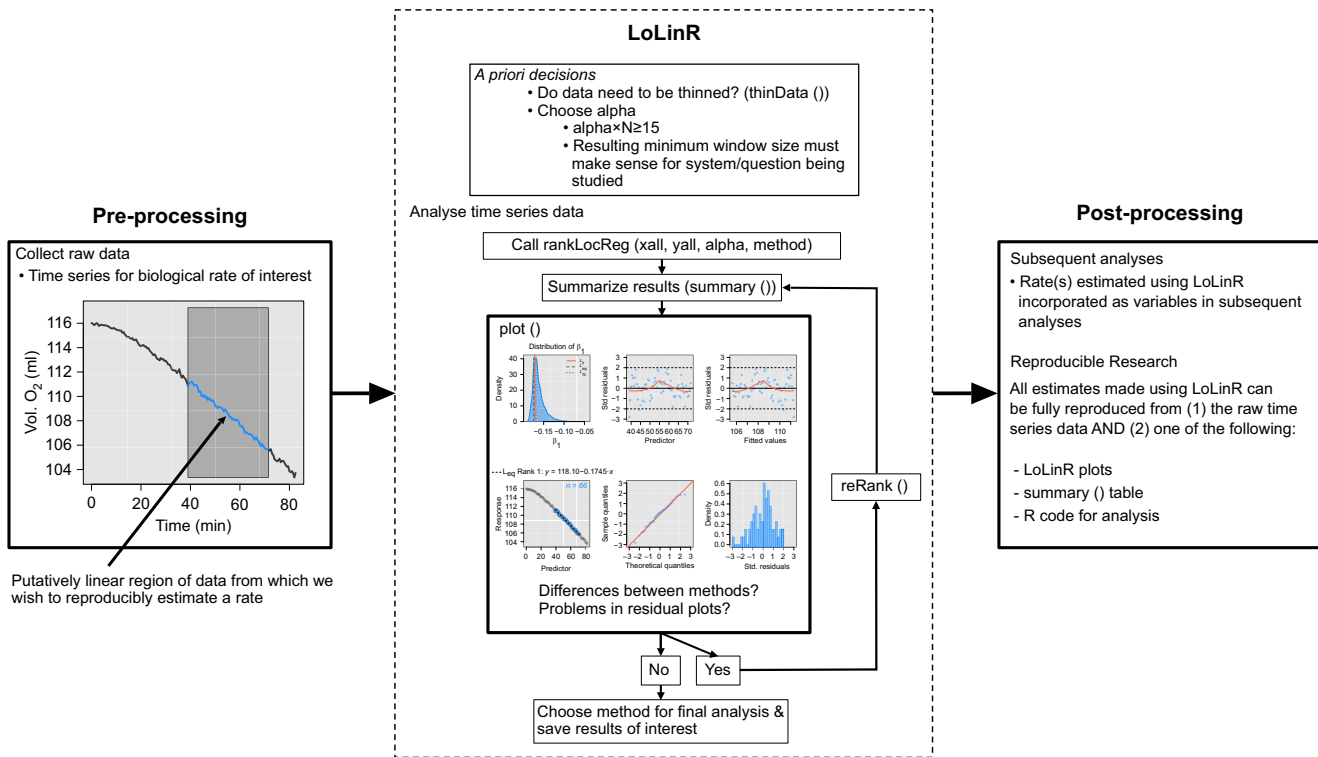

**Fig. 1. Schematic diagram showing a typical LoLinR workflow, as well as how using LoLinR to estimate biological rates would fit into an experimental project workflow.** In this example, O<sub>2</sub> saturation data are being used to estimate metabolic rate for an individual sea urchin (*Helicodaris erythrogramma*; C.O. and D.J.M., unpublished data). The putatively linear region of interest occurs after equipment equilibration, but before the urchin begins to show physiological responses to declining oxygen. Crucially, any estimate made using LoLinR can be easily reproduced from two pieces of information: (1) the raw time series data, and (2) LoLinR plots or summary tables or the R code used to implement the analysis. Each of these can be very easily compiled into appendices for published studies, making LoLinR analyses very easy to reproduce.

modification of traditional Loess regression techniques built around the wrapper function rankLocReg. While Loess techniques are designed primarily for data interpolation and visualization, rankLocReg stores relevant data from all possible local regressions of ordered subsets (adjacent points) of a full time series, given a minimum window size. The function returns an object of class rankLocReg, which includes a ranked list of the most linear subsets of the data, as well as corresponding data for each local regression. A call to rankLocReg implements three steps: (1) define the minimum window size, (2) fit local regressions and (3) rank local regressions.

The only user-defined constraint imposed on the analysis is alpha, which defines the minimum window size used to fit local regressions, expressed as a proportion of the total number of observations in the full data set (analogous to a traditional Loess smoothing parameter). At a minimum, alpha must take into account the total number of observations in the full data set, *N*, such that (alpha × *N*) ≥ 15 (Harrell, 2001). Ideally, (alpha × *N*) should also represent a biologically meaningful interval for the given data set. A call to rankLocReg fits all possible local regressions with *n* ≥ (alpha × *N*) adjacent observations using ordinary least squares.

To quantify linearity for each of the local regressions, we define the combined linearity metric *L*, which represents a weighted sum of three component metrics. The first metric is the skewness of the standardized residuals for the local regression, estimated as the Fisher–Pearson standardized third moment coefficient:

$$S = \frac{n}{(n - 1) \times (n - 2)} \times \sum \left[ \left( \frac{x - \bar{x}}{\sigma(x)} \right)^3 \right], \quad (1)$$

where  $\sigma(x)$  is the sample standard deviation of *x*. The second metric is the range of the 95% confidence interval (CI) for the slope of the local regression  $\beta_1$ :

$$CI \text{ range} = \left( \beta_1 + t_{0.975}^* \times \frac{\sigma}{\sqrt{n}} \right) - \left( \beta_1 - t_{0.025}^* \times \frac{\sigma}{\sqrt{n}} \right), \quad (2)$$

where  $\sigma$  is the sample standard deviation and *n* is the number of observations used in the local regression, and the asterisks indicate the ‘critical’ *t*-values associated with the 97.5th and 2.5th percentiles. The third and final metric is a modified Breusch–Godfrey statistic:

$$R_{BG}^2 = \frac{nR^2}{n}, \quad (3)$$

for serial correlation of the standardized residuals of the local regression up to order (*n* − *k* − 1) (where *k* is the number of parameters in the fitted model – usually 2). We divide the traditional *nR*<sup>2</sup> Breusch–Godfrey statistic by *n* to remove the multiplicative effect of sample size. We do this because we wish to compare the variance explained by local regressions with different sample sizes, rather than perform a significance test for an asymptotically  $\chi_{d.f.=n}^2$  distributed variable with fixed sample size *n*. It is also possible to account for autocorrelation using generalized linear models with a specified correlation structure. However, the *R*<sub>BG</sub><sup>2</sup> metric accounts for serial correlation up to the maximum lag of (*n* − *k* − 1) inclusive, and does not require additional assumptions made by alternative correlation structures. Each of the three component metrics, *x*, are **Z** standardized against the minimum value (or minimum absolute

value for  $S$ ) obtained from all  $i$  fitted local regressions as:

$$\mathbf{Z}_{\min}[x_i] = \frac{x_i - \min(x)}{\sigma(x)},$$

$$\mathbf{Z}_{\min(\text{abs})}[x_i] = \frac{x_i - \min(\text{abs}(x))}{\sigma(x)},$$
(4)

where  $\sigma$  is the sample standard deviation, ensuring that all component metrics have a common scale, and smaller values of each correspond to greater linearity of the associated local regression. Thus, the combined linearity metric without any further weighting of the component metrics is defined as:

$$L_Z = \mathbf{Z}_{\min(\text{abs})}[S] + \mathbf{Z}_{\min}[\text{CI range}] + \mathbf{Z}_{\min}[R_{\text{BG}}^2].$$
(5)

$L_Z$  implicitly weights the contributions of each component metric by the relative magnitudes of their empirical variances for a given data set. For the many cases where the empirical distributions of the component metrics differ, we define and strongly recommend two alternative weighting methods:  $L_{\text{eq}}$  and  $L_{\%}$ .  $L_{\text{eq}}$  enforces equal weights by dividing the  $\mathbf{Z}_{\min}$  scores for each metric by their maximum value before summing.  $L_{\%}$  sums the percentile-ranks of the  $\mathbf{Z}_{\min}$  scores for each component metric. The choice of weighting method will ultimately depend on the specific characteristics of each data set, the alpha value used for the rankLocReg analysis, and the biology of the system being studied.

When used with rankLocReg objects, the plot function generates several diagnostic plots to help determine the most appropriate method for a given analysis. Users can examine results from alternative  $L$  metrics by using the reRank function. Fig. 1 provides a schematic overview of a typical workflow using LoLinR to estimate biological rates. Crucially, analyses using LoLinR can be fully reproduced from (1) the time series data and (2) any one of the following: summary plots, summary tables or the R code used to perform the analysis. All are easily included as appendices or supplementary material to published articles, making LoLinR analyses extremely easy to reproduce.

## RESULTS AND DISCUSSION

### Larval metabolic rate

The first example is from a study of allometric scaling of metabolic rate during larval development in two bryozoan species (*Bugula neritina* and *Watersipora subquortata*; Pettersen et al., 2015). Metabolic rate was estimated for individual larva from  $\text{O}_2$  saturation time series collected using closed chambers. Fig. 2A provides an example of the analytical challenge presented by these data. The full time series is clearly non-linear: the rate of  $\text{O}_2$  consumption initially decelerates as the chamber and larva equilibrate after handling. There is also a subtle acceleration towards the end of the time series, probably resulting from a physiological response by the larva to declining  $\text{O}_2$  availability (Lagos et al., 2015), or accumulation of bacterial biofilm that began to consume oxygen. Any estimate of  $\text{O}_2$  consumption rate including these non-linearities would be conflated

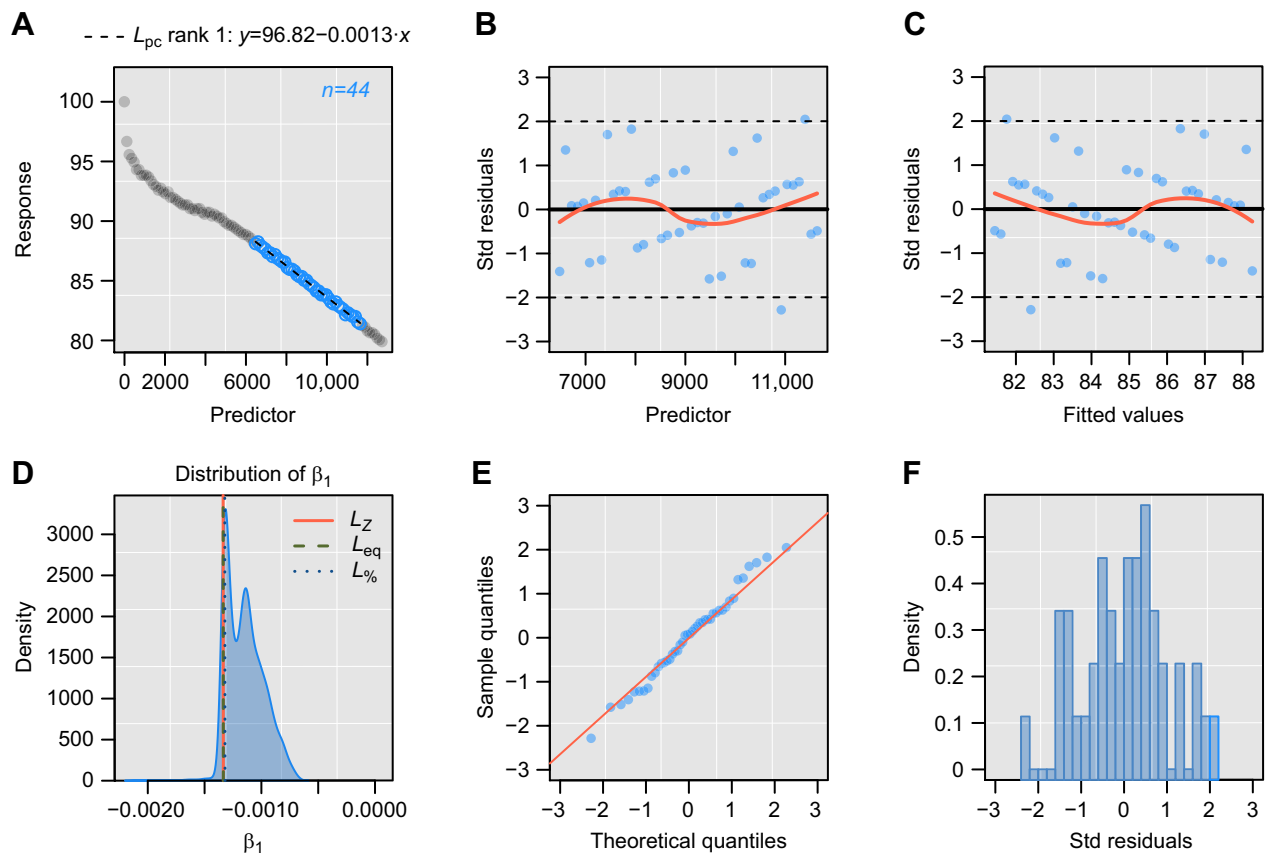

**Fig. 2.** Diagnostic plots generated by the plot command for the  $L_{\%}$  rank 1 local regression for the *Bugula* larva respiration time series data. Data are from Pettersen et al. (2015). The output plots show: (A) the full time series, with the rank 1 local regression highlighted in blue, along with the associated regression equation and number of observations; (B) standardized residuals for the chosen local regression, regressed against the predictor variable (time in seconds for the *Bugula* data set); (C) standardized residuals regressed against the fitted values; (D) density plot with empirical distribution of local regression slopes ( $\beta_1$ ), benchmarked against the slopes of the rank 1 local regressions for each  $L$  metric; (E) normal-quantile-quantile plot for the rank 1 local regression; and (F) a histogram of the distribution of the standardized residuals for the rank 1 local regression.

with these other processes. However, truncating the data to exclude these non-linearities is subjective and difficult, especially for the subtle curvature towards the end of the data set. Ultimately, we wish to identify the region where the relationship between  $O_2$  concentration and time is most linear, and estimate its slope.

Using the LoLinR package, we can analyse this data set with the call:

```
library(LoLinR)
data(BugulaData)
BugulaRegs <- rankLocReg(
  xall=BugulaData$Time.s, yall=BugulaData$D1,
  alpha=0.2, method="eq")
```

which implements the rankLocReg function with a minimum window size of  $\alpha=0.2$ , and uses the linearity metric  $L_{eq}$  to rank local regressions. This alpha value results in a minimum window size of  $(\alpha \times N)=22$  for this data set. This call returns an object of class rankLocReg which includes a ranked list of all possible local regressions, the number of local regressions fitted and several summary statistics. Examination of the summary output and the distribution of local regression slopes (Fig. 2D, density plot) indicates that both the  $L_Z$  and  $L_{eq}$  weighting methods return the same rank 1 local regression, while the  $L_{\%}$  method returns a slightly different result. However, all three methods identify local regressions in the later half of the time series, where the rate of  $O_2$  consumption has stabilized. The  $L_{\%}$  rank 1 local regression includes a larger subset of the data ( $n=44$  observations) than the other two methods ( $n=26$ ), and all three rank 1 local regressions have nearly identical slopes ( $L_Z$ ,  $L_{eq}$ :  $\beta_1=-0.00133$ ;  $L_{\%}$ :  $\beta_1=-0.00132$ ). Given the similarity of the results, we would recommend using the  $L_{\%}$  method in this case, because it provides greater statistical power for the estimation of  $\beta_1$ , the parameter of interest. Inspection of the chosen local regression and accompanying residual plots also suggests that other than some autocorrelation, which is expected in time series data, there are no other major concerns (Fig. 2C–F).

A comparison of this result with common alternative approaches highlights the usefulness of the methods. Naive linear regression of the full time series yields an estimate of  $\beta_1=-0.00119$ , indicating that non-linearities, particularly early in the time series, result in under-estimation of the metabolic rate. Estimates obtained by linear regression of manually truncated subsections of these data (with the same window size of  $n=22$  observations) can range from  $\beta_1=-0.00212$  to  $\beta_1=-0.00067$ , more than a threefold difference in the estimate of metabolic rate. In addition to being methodologically

opaque and conflating the desired rate with other experimental and biological processes, these common *ad hoc* methods can give highly inaccurate estimates.

### Flow-through respirometry

The second example is a study of the metabolic costs of living in the Arctic for great cormorants (*Phalacrocorax carbo*) (White et al., 2011a). In this study, metabolic rate was estimated for individual birds using flow-through respirometry protocols (see supplementary material in White et al., 2011a). These techniques generate time series of the rate of  $O_2$  consumption ( $\dot{V}_{O_2}$ , ml  $O_2$   $kg^{-1}$   $min^{-1}$ ) rather than  $O_2$  saturation or concentration. For these data, the analytic goal was to estimate resting metabolic rate, which should correspond to the subset of the time series where  $\dot{V}_{O_2}$  is lowest and most linear. Conventional methods for estimating  $\dot{V}_{O_2}$  from flow-through respirometry data are based on analysis of the distribution of sequences of adjacent data points, and the minimum running average of subsets of adjacent points with varying numbers of included observations (e.g. Withers, 2001). Here, we illustrate how rankLocReg can be used to estimate resting metabolic rate from these data by leveraging the statistical framework of local linear regression and examining the distribution of standardized residuals.

We analyse a representative  $\dot{V}_{O_2}$  time series for an individual cormorant. The time series is non-linear with large spikes occurring when the animal is physically active inside the chamber, but there appears to be a region of relative stability between 2.5 and 5.25 h (Fig. 3). We analyse the thinned data with a call to rankLocReg using  $\alpha=0.1$ . This ensures that the minimum window size corresponds to approximately 30 min, and a minimum of 15 observations for the local regressions. Although we are not necessarily interested in the slopes of the local regressions ( $\beta_1$ ), an examination of the distribution of  $\beta_1$  highlights the fact that the  $L_{\%}$  metric returns a different rank 1 local regression from the other two  $L$  metrics (Fig. 3A). For these data, the  $L_Z$  and  $L_{eq}$  metrics misidentify the most stable subset of these data (a consequence of strongly skewed empirical distribution of  $R_{BG}^2$ ) (Fig. 3B; Fig. S1). However,  $L_{\%}$  identifies a period of approximately 2 h where  $\dot{V}_{O_2}$  is most stable (Fig. 3C). The average (or median)  $\dot{V}_{O_2}$  during this period is easily recovered using the summary for this analysis, and returns an estimate of  $\dot{V}_{O_2}$ . This estimate is similar to those obtained using conventional methods ( $\dot{V}_{O_2}=33.90$  and  $35.57$  ml  $kg^{-1}$   $min^{-1}$ ; Fig. S2; see Withers, 2001, for detailed methods), as well as the median of the full time series ( $36.71$  ml  $kg^{-1}$   $min^{-1}$ ), but has two

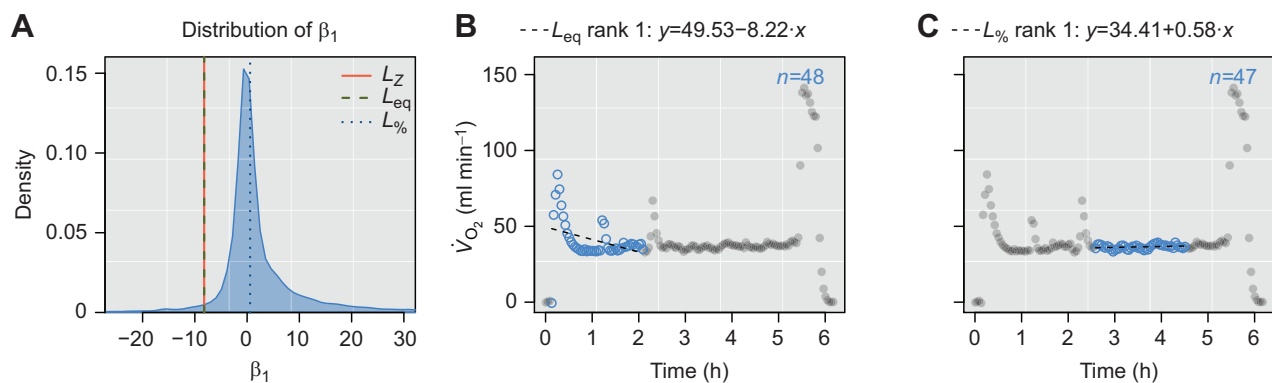

**Fig. 3. Diagnostic plots of flow-through respirometry data from great cormorants.** Data are from White et al. (2011a). Plots show: (A) the distribution of local regression slopes ( $\beta_1$ ; note that long tails on the distribution have been truncated to emphasize differences in the  $L$  metric benchmarks); (B) the  $L_{eq}$  rank 1 local regression, which misidentifies the subset of data where  $O_2$  consumption was most stable; and (C) the  $L_{\%}$  rank 1 local regression, which identifies a reasonable subset of the full time series where the rate of  $O_2$  consumption is most stable.



distinct advantages. First, the  $L$  metrics provide an objective measure of linearity to identify periods of stability in the  $\dot{V}_{O_2}$  time series. Second, the  $L$  metrics do not preferentially select the smallest possible subset of the time series to estimate resting metabolic rate, resulting in an estimate that is based on more observations, and therefore has more statistical power ( $n=47$  using LoLinR;  $n=11$  or 18 using conventional methods).

## Appendix

### Quantifying LoLinR performance using simulated data

An informative comparison between the methods provided in LoLinR and common alternatives is deceptively difficult for at least two reasons. First, the most common alternative methods (e.g. eyeballing the data to select a linear region and then running a linear regression, or the methods described in Withers, 2001) simply cannot be reliably compared with LoLinR because they are not objectively reproducible. Second, generating appropriate simulated data for the types of analyses LoLinR is designed to assist with (i.e. where some subset of a time series is indeed linear, or expected to be linear, but the rest is arbitrarily non-linear) is a non-trivial problem. This is particularly problematic when the specific nature of the non-linearity has a strong influence on the behaviour of the methods that LoLinR might be compared against (e.g. naive linear regression of full data sets). As a first step towards providing objective validation and comparison of our methods, we provide functions to generate simulated data and analyse the performance of rankLocReg (see Script S1). However, we emphasize that this is not a comprehensive sensitivity analysis, but rather a starting point for validating our methods and making future comparisons with other reproducible methods. Here, we briefly describe how simulated data were generated, and how the performance of rankLocReg was assessed.

We generated simulated data that roughly resemble  $O_2$  consumption data (similar to the ‘Larval metabolic rate’ example in Results and Discussion), with an initial phase of acceleration/deceleration which then stabilizes as a straight line. Simulated data sets are composed of 100 observations. The first 50 observations are non-linear, following a sine wave from the apex (or trough) at  $\pm\pi/2$  to the inflection point at  $\pm\pi$ . The second 50 observations are linear, following  $y=\beta_0\pm x\beta_1$ , where  $\beta_0$  is equal to the 50th observation (the last of the non-linear subset), and the regression slope is uniformly distributed on the intervals  $\beta_1\in[-0.028, -0.004] \cup [0.004, 0.028]$ . We add a small amount of normally distributed noise to the entire data set [ $\varepsilon\sim N(0, 0.05)$ ] to simulate random variation present in real-time series data. We analyse each randomly generated data set using rankLocReg, with  $\alpha=0.2$ .

To quantify the performance of rankLocReg, we use three simple metrics. (1) The difference between the actual slope of the linear subset of the simulated data and the slope of the local linear regressions identified by rankLocReg ( $\Delta_i=\beta_i-\beta_{\text{real}}$ ), where  $i$  indicates each of the  $L$  methods used by rankLocReg ( $i\in[Z, \text{eq}, \%]$ ). As each of the three  $L$  metrics performs differently for different data sets, we also compare the difference between the real regression slope and the best of the three local regressions identified by rankLocReg (i.e. the one with the smallest  $\Delta_i$ ), which we designate  $\Delta_{\text{best}}$ . (2) The proportion of the linear subset of the data that is correctly included in the local linear regressions identified by rankLocReg. (3) The proportion of the observations included in local linear regressions that correctly include the linear subset of the data.

### Results summary

For this particular type of simulated test data, rankLocReg performs remarkably well, particularly in comparison with a naive linear

regression of the full data sets. The result of this specific comparison is not surprising, however, as the curvature in the first half of the simulated data results in systematic bias of  $\beta_{\text{naive}}$  towards 0. This is reflected in Fig. S3A, where the distribution of  $\Delta_{\text{naive}}$  is right skewed with a thicker tail than the distribution of  $\Delta_{\text{best}}$ . In contrast,  $\Delta_{\text{best}}$  is tightly distributed about 0, with a few outliers in the right tail. Each of the three  $L$  metrics performs similarly, although the local regressions identified using the  $L_{\%}$  methods are generally better at recovering regression slopes that are more similar to  $\beta_{\text{real}}$  (Fig. S3B). As expected, the absolute values of  $\beta_{\text{real}}$  also influence the performance of rankLocReg. Overall, rankLocReg performs better when  $\beta_{\text{real}}$  is further from 0 (Fig. S3C). Specifically, when  $\beta_{\text{real}}$  is negative but close to 0, rankLocReg tends to choose regressions that include the non-linear portion of the data, with slopes that are more steeply negative than  $\beta_{\text{real}}$ . When  $\beta_{\text{real}}$  is positive but close to 0, rankLocReg tends to choose local regressions with more steeply positive slopes than  $\beta_{\text{real}}$  for the same reasons. This behaviour makes sense because the 95% CI for  $\beta_1$  is used to calculate the  $L$  metrics used by rankLocReg, which becomes increasingly inflated as  $\beta_{\text{real}}$  approaches 0.

rankLocReg also does a reasonably good job of correctly identifying the truly linear subset of these simulated data. This is encouraging, particularly because the curvature of the simulated data in this example should make this rather difficult. This is because the second half of the non-linear portion of the simulated data is increasingly linear (with a slope of  $\beta_1\approx\pm 0.016$  on the  $x$ -scale used for this analysis) as they approach the inflection point of the sine wave at  $\pm\pi$ . Thus, it should be difficult for rankLocReg to distinguish between the end of the non-linear subset of the data and the truly linear subset. However, at least one of the  $L$  methods implemented by rankLocReg (i.e. the ‘best’ local regression with the smallest  $\Delta$  value) generally included a large fraction of the truly linear subset of the data (Fig. S3D). However, there was quite a bit of variability in the performance of each of the  $L$  methods (Fig. S3E). The  $L_Z$  and  $L_{\text{eq}}$  methods in particular either performed very well or very poorly at identifying the truly linear subset of the data. In contrast, the  $L_{\%}$  method generally identified at least half of the truly linear subset (Fig. S3E). The ability of rankLocReg to correctly identify the truly linear subset of the data was again sensitive to the absolute value of  $\beta_{\text{real}}$ . Specifically, even the ‘best’ local regression mis-identified the truly linear subset more frequently as  $\beta_{\text{real}}$  approached 0 (Fig. S3F).

rankLocReg also performed well at identifying local regressions that correctly include the truly linear subset of the data. For a large majority of simulated data sets, more than half of the observations included in the ‘best’ local regression identified by rankLocReg were part of the truly linear subset of the data (Fig. S3G). However, there was again significant variability in the performance of each of the three  $L$  methods (Fig. S3H). The  $L_{\%}$  method clearly performed the best in this respect, generally choosing local regressions with the majority of observations falling within the truly linear subset of the data (Fig. S3H). However, the  $L_Z$  method generally performed very poorly, choosing local regressions that badly mis-identified the linear subset of the data, or choosing local regressions of which only half of the included observations were actually part of the truly linear subset (Fig. S3H). The  $L_{\text{eq}}$  method also performed poorly, but was better at identifying local regressions, with the majority of observations falling within the truly linear subset of the data (Fig. S3H). Once again, the performance of even the ‘best’ local regression became worse as  $\beta_{\text{real}}$  approached 0. The variability in the performance of the three  $L$  methods is almost certainly a direct consequence of the difficulty in distinguishing between the end of the non-linear and the beginning of the linear subsets of these

simulated data. This is particularly clear for  $L_{\%}$ , which often identified local regressions that spanned both the non-linear and linear portions of the data.

Four main conclusions emerge from this limited test of the performance of rankLocReg against simulated data. First, rankLocReg performs better than naive linear regression of full time series at estimating the slope of a linear subset of the time series. Second, this analysis strongly supports our recommendations in the Materials and Methods and Results and Discussion sections that  $L_{\%}$  be used as the preferred weighting method.  $L_{\%}$  is generally more robust and does a better job than the other methods of choosing local regressions that both accurately estimate  $\beta_{\text{real}}$  and correctly include the truly linear subset of these simulated data. Third, rankLocReg becomes progressively better at accurately estimating  $\beta_{\text{real}}$  values that are further from 0 (and presumably further from 1 as well). Fourth, this analysis highlights that while there can be significant variation in the performance of each of the three  $L$  metric weighting methods, it is rare that all three mis-identify the truly linear subset of the time series. Taken together, these results indicate that the methods provided in LoLinR perform well for their intended purpose for the type of data simulated here.

#### Acknowledgements

The authors thank A. Pettersen and G. Yvon-Durocher for graciously providing data, and two anonymous reviewers.

#### Competing interests

The authors declare no competing or financial interests.

#### Author contributions

Conceptualization: C.O. and D.R.B.; Methodology: C.O. and D.R.B.; Software: C.O. and D.R.B.; Writing – original draft preparation: C.O.; Writing – review and editing: C.R.W., D.J.M. and D.R.B.; Funding acquisition: D.J.M. and C.R.W.

#### Funding

This work was funded by a Monash University Dean's International Postgraduate Student Scholarship to C.O., Australian Research Council grants to D.J.M. and C.R.W., and a Monash University Centre for Geometric Biology Post-Doctoral Fellowship to D.R.B.

#### Data accessibility

All data used in this study are included in the LoLinR package and available at <https://github.com/colin-olito/LoLinR>.

#### Supplementary information

Supplementary information available online at <http://jeb.biologists.org/lookup/doi/10.1242/jeb.148775.supplemental>

#### References

- Barneche, D. R., Kulbicki, M., Floeter, S. R., Friedlander, A. M., Maina, J. and Allen, A. P. (2014). Scaling metabolism from individuals to reef-fish communities at broad spatial scales. *Ecol. Lett.* **17**, 1067–1076.

- Brown, J. H., Gillooly, J. F., Allen, A. P., Savage, V. M. and West, G. B. (2004). Toward a metabolic theory of ecology. *Ecology* **85**, 1771–1789.
- Fang, F. C., Steen, R. G. and Casadevall, A. (2012). Misconduct accounts for the majority of retracted scientific publications. *Proc. Natl. Acad. Sci. USA* **109**, 17028–17033.
- Gillooly, J. F., Brown, J. H., West, G. B., Savage, V. M. and Charnov, E. L. (2001). Effects of size and temperature on metabolic rate. *Science* **293**, 2248–2251.
- Grieneisen, M. L. and Zhang, M. (2012). A comprehensive survey of retracted articles from the scholarly literature. *PLoS ONE* **7**, e44118.
- Harrell, F. E. (2001). *Regression Modelling Strategies with Applications to Linear Models, Logistic Regression and Survival Analysis*. New York, USA: Springer.
- Lagos, M. E., White, C. R. and Marshall, D. J. (2015). Avoiding low-oxygen environments: oxytaxis as a mechanism of habitat selection in a marine invertebrate. *Mar. Ecol. Prog. Ser.* **540**, 99–107.
- Larmola, T., Bubier, J. L., Kobyljanec, C., Basiliko, N., Juutinen, S., Humphreys, E., Preston, M. and Moore, T. R. (2013). Vegetation feedbacks of nutrient addition lead to a weaker carbon sink in an ombrotrophic bog. *Glob. Change Biol.* **19**, 3729–3739.
- Marshall, D. J., Bode, M. and White, C. R. (2013). Estimating physiological tolerances - a comparison of traditional approaches to nonlinear regression techniques. *J. Exp. Biol.* **216**, 2178–2182.
- Pettersen, A. K., White, C. R. and Marshall, D. J. (2015). Why does offspring size affect performance? Integrating metabolic scaling with life-history theory. *Proc. R. Soc. B Biol. Sci.* **282**, 20151946.
- R Core Team (2016). R: A language and environment for statistical computing. R Foundation for Statistical Computing, Vienna, Austria. URL <https://R-project.org/>
- Ross, D. J., Longmore, A. R. and Keough, M. J. (2013). Spatially variable effects of a marine pest on ecosystem function. *Oecologia* **172**, 525–538.
- Shapiro, J. B., Griffin, K. L., Lewis, J. D. and Tissue, D. T. (2004). Response of *Xanthium strumarium* leaf respiration in the light to elevated CO<sub>2</sub> concentration, nitrogen availability, and temperature. *New Phytol.* **162**, 377–386.
- Song, K., Lee, S.-H. and Kang, H. (2011). Denitrification rates and community structure of denitrifying bacteria in newly constructed wetland. *Eur. J. Soil Biol.* **47**, 24–29.
- Stinchcombe, J. R. and Kirkpatrick, M. and Function-valued Traits Working Group (2012). Genetics and evolution of function-valued traits: understanding environmentally responsive phenotypes. *Trends Ecol. Evol.* **27**, 637–647.
- Tanaka, T., Alliouane, S., Bellerby, R. G. B., Czerny, J., de Kluijver, A., Riebesell, U., Schulz, K. G., Silyakova, A. and Gattuso, J.-P. (2013). Effect of increased pCO<sub>2</sub> on the planktonic metabolic balance during a mesocosm experiment in an Arctic fjord. *Biogeosciences* **10**, 315–325.
- White, C. R., Grémillet, D., Green, J. A., Martin, G. R. Butler, P. J. (2011a). Metabolic rate throughout the annual cycle reveals the demands of an Arctic existence in Great Cormorants. *Ecology* **92**, 475–486.
- White, C. R., Kearney, M. R., Matthews, P. G. D., Kooijman, S. A. L. M. and Marshall, D. J. (2011b). A manipulative test of competing theories for metabolic scaling. *Am. Nat.* **178**, 746–754.
- Withers, P. C. (2001). Design, calibration, and calculation for flow-through respirometry systems. *Aust. J. Zool.* **49**, 445–461.
- Yen, J. D. L., Thomson, J. R., Paganin, D. M., Keith, J. M. and MacNally, R. (2015). Function regression in ecology and evolution: FREE. *Methods Ecol. Evol.* **6**, 17–26.
- Yvon-Durocher, G., Allen, A. P., Cellamare, M., Dossena, M., Gaston, K. J., Leitao, M., Montoya, J. M., Reuman, D. C., Woodward, G. and Trimmer, M. (2015). Five years of experimental warming increases the biodiversity and productivity of phytoplankton. *PLoS Biol.* **13**, e1002324.
